# Supplementary material for: Using Bacteriophages to Treat Resilient Bacteria Found in Produced Water
Source: MDPI journal article supplement (doi:10.3390/w16060797), 2024-03-07
Supplement: s1 [file s1]

Archive with 1 entries (1 files):
- water-2867276-supplementary.pdf
