# Supplementary material for: Using Bacteriophages to Treat Resilient Bacteria Found in Produced Water
Source: MDPI journal article supplement (doi:10.3390/w16060797), 2024-03-07
Supplement: s1 [file s1 › water-2867276-supplementary.pdf]

## SUPPLEMENTARY MATERIALS

**Table S 1 Effect of PA phage SN on the *P. aeruginosa* strain HER-1018 population in low salinity PW using Wilcoxon sign-rank test (N=26).**

### Descriptive Statistics

|                                | N  | Min        | Q1      | Median  | Q3      | Max     |
|--------------------------------|----|------------|---------|---------|---------|---------|
| <i>P. aeruginosa</i> Treatment | 26 | 1.57866E-4 | 0.00133 | 0.00204 | 0.0023  | 0.00439 |
| " <i>P. aeruginosa</i> "       | 26 | 0.0111     | 0.01679 | 0.08349 | 0.09177 | 0.10527 |

### Ranks

|                                             |                | N  | Mean Rank | Sum Rank |
|---------------------------------------------|----------------|----|-----------|----------|
| <i>"P. aeruginosa"</i> -<br>Phage treatment | Positive Ranks | 26 | 13.5      | 351      |
|                                             | Negative Ranks | 0  | 0         | 0        |

### Test Statistics

|  | W | Z        | Exact Prob> W | Asymp. Prob> W |
|--|---|----------|---------------|----------------|
|  | 0 | -4.44465 | 2.98023E-8    | 8.80367E-6     |

Null Hypothesis: Median1 = Median2

Alternative Hypothesis: Median1 <> Median2

At the 0.05 level, the two distributions are significantly different.

*P. aeruginosa*'s population reduction assay was conducted by the addition of 500 µL of  $1.2 \times 10^9$  PFU/mL of SN phage stock and co-incubation with the host in PW for 24 hours at 37°C.

**Table S 2 Effect of BM phage Slash on the *B. megaterium* sp. population in low salinity PW using t-test for two independent samples (N=19).**

### Descriptive Statistics

|                      |            | N  | Mean    | SD      | SEM     | Median |
|----------------------|------------|----|---------|---------|---------|--------|
| <i>B. megaterium</i> |            | 19 | 0.62382 | 0.62867 | 0.14423 | 0.442  |
| Slash treatment      |            | 19 | 0.25905 | 0.39137 | 0.08979 | 0.045  |
|                      | Difference | 19 | 0.36476 |         | 0.16989 | 0.123  |
|                      | Overall    | 38 | 0.44143 | 0.54859 | 0.08899 | 0.0595 |

Standard Error of Mean (SEM) of difference is computed under the condition that equal variance is assumed.

### t-Test Statistics

|                                               | t Statistic | DF      | Prob> t |
|-----------------------------------------------|-------------|---------|---------|
| Equal Variance Assumed                        | 2.14706     | 36      | 0.0386  |
| Equal Variance NOT Assumed (Welch Correction) | 2.14706     | 30.1301 | 0.03996 |

Null Hypothesis: mean1-mean2 = 0

Alternative Hypothesis: mean1-mean2 <> 0

At 0.05 level, when equal variance is assumed, Mean1 - Mean2 is significantly different from 0

At 0.05 level, when equal variance is NOT assumed, Mean1 - Mean2 is significantly different from 0

*B. megaterium*'s population reduction assay was conducted by the addition of 500 µL of  $1.6 \times 10^9$  PFU/mL of Slash phage stock and co-incubation with the host in PW for 24 hours at 37°C.

**Table S 3 Effect of BM phage Palmer on the *B. megaterium* sp. population in low salinity PW using t-test for two independent samples (N=19).**

**Descriptive Statistics**

|                      |            | N  | Mean    | SD      | SEM     | Median |
|----------------------|------------|----|---------|---------|---------|--------|
| <i>B. megaterium</i> |            | 19 | 0.62382 | 0.62867 | 0.14423 | 0.442  |
| Palmer treatment     |            | 19 | 0.15409 | 0.20039 | 0.04597 | 0.077  |
|                      | Difference | 19 | 0.46973 |         | 0.15138 | 0.094  |
|                      | Overall    | 38 | 0.38895 | 0.51813 | 0.08405 | 0.1105 |

Standard Error of Mean (SEM) of difference is computed under the condition that equal variance is assumed.

**t-Test Statistics**

|                                               | t Statistic | DF       | Prob> t |
|-----------------------------------------------|-------------|----------|---------|
| Equal Variance Assumed                        | 3.10306     | 36       | 0.00372 |
| Equal Variance NOT Assumed (Welch Correction) | 3.10306     | 21.62034 | 0.00526 |

Null Hypothesis: mean1-mean2 = 0

Alternative Hypothesis: mean1-mean2 <> 0

**At 0.05 level, when equal variance is assumed, Mean1 - Mean2 is significantly different from 0**

**At 0.05 level, when equal variance is NOT assumed, Mean1 - Mean2 is significantly different from 0**

*B. megaterium*'s population reduction assay was conducted by the addition of 500 µL of 2.7x10<sup>9</sup> PFU/mL of Palmer phage stock and co-incubation with the host in PW for 24 hours at 37°C.

**Table S 4 Effect of BM phages cocktail on the *B. megaterium* sp. population in low salinity PW using t-test for two independent samples (N=4).**

**Descriptive Statistics**

|                      |            | N | Mean   | SD      | SEM     | Median |
|----------------------|------------|---|--------|---------|---------|--------|
| <i>B. megaterium</i> |            | 4 | 4.175  | 2.24687 | 1.12344 | 4.665  |
| Phage cocktail       |            | 4 | 0.97   | 1.27389 | 0.63695 | 0.56   |
|                      | Difference | 4 | 3.205  |         | 1.29144 | 2.785  |
|                      | Overall    | 8 | 2.5725 | 2.40707 | 0.85103 | 2.03   |

Standard Error of Mean (SEM) of difference is computed under the condition that equal variance is assumed.

**t-Test Statistics**

|                                               | t Statistic | DF      | Prob> t |
|-----------------------------------------------|-------------|---------|---------|
| Equal Variance Assumed                        | 2.48173     | 6       | 0.04769 |
| Equal Variance NOT Assumed (Welch Correction) | 2.48173     | 4.74806 | 0.05832 |

Null Hypothesis: mean1-mean2 = 0

Alternative Hypothesis: mean1-mean2 <> 0

**At 0.05 level, when equal variance is assumed, Mean1 - Mean2 is significantly different from 0**

**At 0.05 level, when equal variance is NOT assumed, Mean1 - Mean2 is NOT significantly different from 0**

*B. megaterium*'s population reduction assay was conducted by the addition of 500 µL of 1.6x10<sup>9</sup> PFU/mL of Slash phage and 2.7x10<sup>9</sup> PFU/mL of Palmer phage stock and co-incubation with the host in PW for 24 hours at 37°C.
